# Supplementary material for: Effect of Liver Fibrosis on Oral and Gut Microbiota in the Japanese General Population Determined by Evaluating the FibroScan–Aspartate Aminotransferase Score
Source: MDPI journal article supplement (doi:10.3390/ijms241713470), 2023-08-30
Supplement: s1 [file s1]

## Supplementary Materials

**Supplementary Table S1.** Participant characteristics at baseline. Number or median (range).

|                               | FAST< 0.35<br>(n=812) | FAST≥ 0.35<br>(n=33) | <i>p</i> -value |
|-------------------------------|-----------------------|----------------------|-----------------|
| Sex (male/female)             | 341:471               | 21:12                | 0.012           |
| Age (years)                   | 51.0 (39.0–64.0)      | 62.0 (44.0–67.0)     | 0.022           |
| BMI (kg/m <sup>2</sup> )      | 22.4 (20.1–24.7)      | 25.6 (24.2–30.8)     | < 0.001         |
| Platelets (×10 <sup>4</sup> ) | 25.7 (22.6–29.9)      | 23.3 (21.1–28.3)     | 0.068           |
| Albumin (g/dL)                | 4.4 (4.2–4.6)         | 4.4 (4.2–4.6)        | 0.798           |
| Total bilirubin (mg/dL)       | 0.8 (0.7–1.0)         | 0.8 (0.6–1.0)        | 0.288           |
| AST (U/L)                     | 21.0 (17.0–24.0)      | 44.0 (38.5–54.0)     | < 0.001         |
| ALT (U/L)                     | 17.0 (13.0–24.0)      | 59.0 (43.0–73.5)     | < 0.001         |
| γGTP (U/L)                    | 21.0 (15.0–35.8)      | 65.0 (46.5–116.0)    | < 0.001         |
| Glucose (mg/dL)               | 91.0 (86.0–99.0)      | 102.0 (91.0–113.0)   | < 0.001         |
| HOMA-IR                       | 1.10 (0.81–1.52)      | 2.37 (1.26–3.60)     | < 0.001         |
| HbA1c (%)                     | 5.6 (5.4–5.8)         | 6.0 (5.5–6.4)        | 0.001           |
| Triglycerides (mg/dL)         | 76.0 (55.0–112.8)     | 120.0 (87.5–166.5)   | < 0.001         |
| HDL cholesterol (mg/dL)       | 64.0 (54.0–76.0)      | 55.0 (47.0–65.0)     | 0.005           |
| LDL cholesterol (mg/dL)       | 116.5 (96.0–136.8)    | 122.0 (105.0–137.0)  | 0.404           |
| Alcohol intake (g/day)        | 1.3 (0.0–17.6)        | 4.4 (0.0–30.9)       | 0.366           |
| FAST score                    | 0.06 (0.03–0.10)      | 0.49 (0.42–0.62)     | < 0.001         |
| FIB-4 index                   | 0.92 (0.64–1.36)      | 1.67 (0.97–1.96)     | < 0.001         |
| Fatty liver index             | 13.9 (5.92–33.1)      | 61.9 (49.1–86.9)     | < 0.001         |
| LS (kPa)                      | 4.2 (3.5–5.2)         | 8.6 (6.3–12.3)       | < 0.001         |
| CAP (dB/m)                    | 219.0 (185.3–261.0)   | 305.0 (268.0–338.0)  | < 0.001         |
| MAFLD                         | 214 (26.4%)           | 24 (72.7%)           | < 0.001         |
| MASLD                         | 199 (24.5%)           | 24 (72.7%)           | < 0.001         |
| Heavy alcohol drinker         | 42 (5.2%)             | 4 (12.1%)            | 0.182           |
| Positive HBs antigen          | 8 (1.0%)              | 0 (0.0%)             | 0.999           |
| Positive HCV antibody         | 16 (2.0%)             | 0 (0.0%)             | 0.871           |

BMI, body mass index; FAST score, FibroScan–aspartate aminotransferase score; FIB-4 index, fibrosis-4 index; HOMA-IR, homeostasis model assessment of insulin resistance; IQR/med, interquartile range/median; AST, aspartate aminotransferase; ALT, alanine aminotransferase; γGTP, gamma-glutamyl trans-peptidase; HDL, high-density lipoproteins; LDL, low-density lipoproteins; HBs, hepatitis B surface; HCV, hepatitis C virus; MAFLD, metabolic-associated fatty liver disease; MASLD, metabolic dysfunction-associated steatotic liver disease; CAP, controlled attenuation parameter; LS, liver stiffness
